# Supplementary material for: Highly sensitive colorimetric detection of Cd(ii) based on silica sol modified with dithizone and cationic surfactant
Source: Royal Society of Chemistry journal article supplement (doi:10.1039/d4ra03983a), 2024-01-01
Supplement: d4ra03983a1.pdf [file d4ra03983a1.pdf]

## Supporting information

### Highly sensitive colorimetric detection of Cd(II) based on silica sol modified with dithizone and cationic surfactant

Arpaporn Litluechai<sup>a</sup>, Arreerat Prompa<sup>a</sup>, Pikaned Uppachai<sup>b</sup>, Wirat Jarernboon<sup>c</sup>  
Nutthaya Butwong<sup>d</sup>, Siriboon Mukdasai<sup>a\*</sup>

<sup>a</sup> *Materials Chemistry Research Center, Department of Chemistry and Center of Excellence for Innovation in Chemistry, Faculty of Science, Khon Kaen University, Khon Kaen 40002, Thailand*

<sup>b</sup> *Department of Applied Physics, Faculty of Engineering, Rajamangala University of Technology Isan, Khon Kaen Campus, Khon Kaen 40000, Thailand*

<sup>c</sup> *Department of Physics, Faculty of Science, Khon Kaen University, Meuang, Khon Kaen, 40002, Thailand*

<sup>d</sup> *Applied Chemistry Department, Faculty of Science and Liberal Arts, Rajamangala University of Technology Isan, Nakhon Ratchasima 30000, Thailand*

\* Corresponding author: E-mail address: sirimuk@kku.ac.th (S. Mukdasai)

## 1. Effects of pH and time

The pH of the aqueous solution plays a key role in the speciation of chelating agents, complex formation, and extraction efficiency. Here, complex formation between DZ and  $\text{Cd}^{2+}$  was investigated in the pH range of 2.0–6.0 using different buffer solutions (0.1 mol L<sup>-1</sup> phosphate buffer and acetate buffer). As shown in **Fig. S1A**, the  $[\text{Cd}^{2+}\text{-DZ}]$  complex solution achieved maximum absorbance at pH 3.0 and a slightly lower absorbance at higher pH. Therefore, the phosphate buffer at pH 3.0 was selected for further experiments.

To study stability of the  $[\text{Cd}^{2+}\text{-DZ}]$  complex, its absorbance was monitored for 50 min. The absorbance increased during the first 30 min and then decreased slightly (**Fig. S1B**). Thus, in the subsequent experiments, the detection of  $\text{Cd}^{2+}$  was carried out at 30 min after mixing.

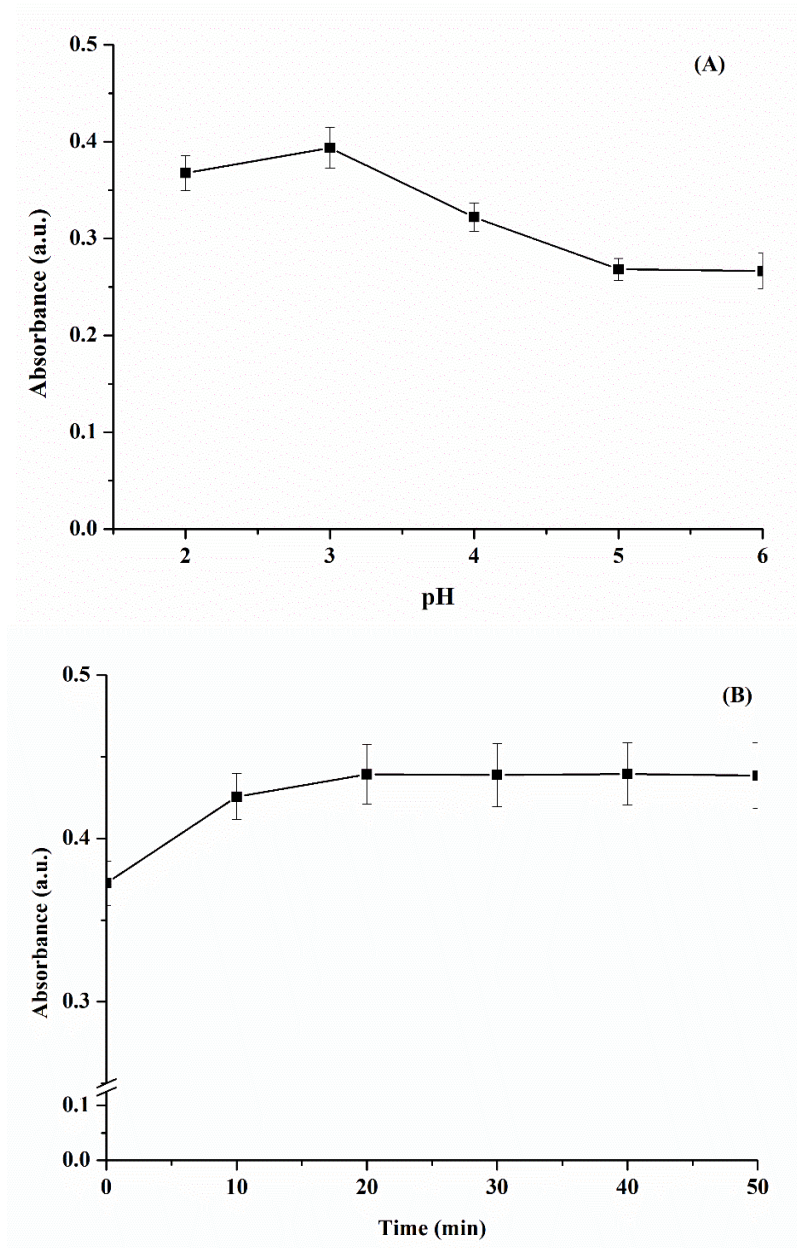

**Fig. S1** Effects of (A) pH and (B) time on the formation of the  $[\text{Cd}^{2+}\text{-DZ}]$  complex.

## 2. Characterization of the silica sol

The functional group of silica sol, and silica particles was studied by fourier transformed infrared (FT-IR) analysis as the result shown in **Fig. S2**. It can be seen that all spectra found broad band at  $3200\text{--}3750\text{ cm}^{-1}$  assigning OH-stretching of silanol. Moreover, the O–H deformation of  $\text{H}_2\text{O}$  ( $\sim 1630\text{ cm}^{-1}$ ) and Si–O–Si stretching ( $\sim 1100\text{ cm}^{-1}$ ) were observed. In addition, silica sol shows Si–OH stretching of silanols on surface at  $960\text{ cm}^{-1}$ . Therefore, it can be confirmed that the silica sol was successfully synthesized.

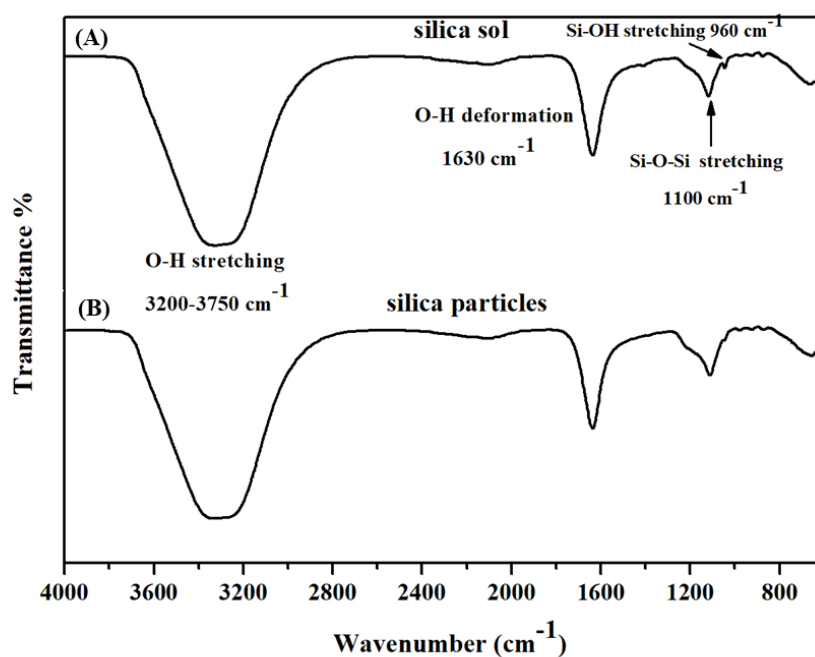

**Fig. S2** FT-IR spectra of the (A) silica sol and (B) silica particles.

### 3. Formation of $\text{Cd}^{2+}$ complex

To investigate the stoichiometry of  $\text{Cd}^{2+}$  and DZ, job's method or continuous variation analysis was carried out. The results indicated that the optimum ratio of  $\text{Cd}^{2+}$  and DZ was 1:1 stoichiometry (**Fig. S3**). When  $\text{Cd}^{2+}$  interacted with DZ, the colored solution was changed from purple to orange which has complex formation constant ( $\log K_f$ ) of 3.36 and maximum absorption wavelength of 435 nm [36,37].

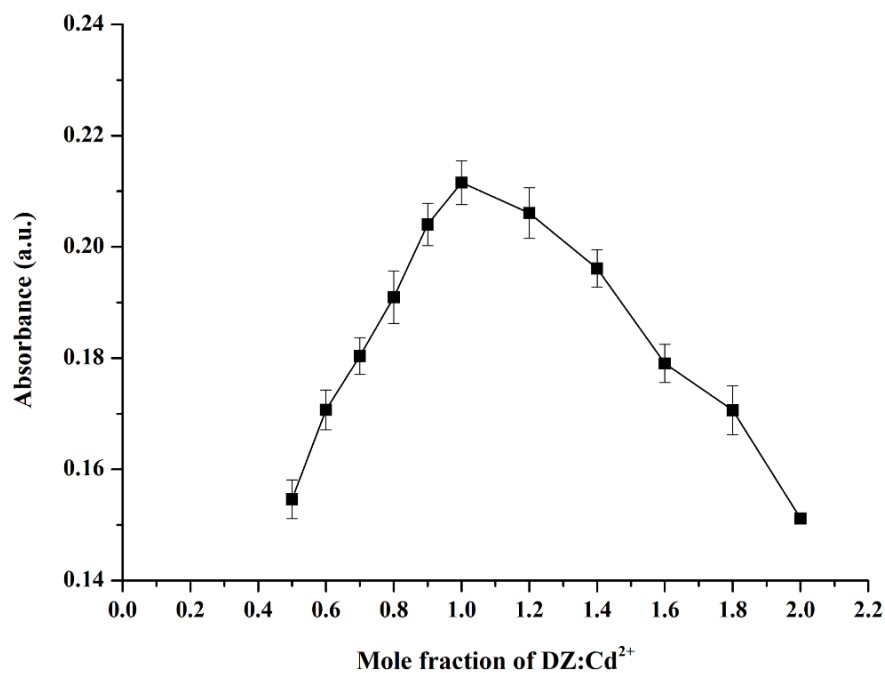

**Fig. S3** Stoichiometry of  $\text{Cd}^{2+}$  and DZ using job's method.
